# Supplementary material
Source: HighWire-hosted journal article supplement (https://erj.ersjournals.com/content/49/6/1601648)
Supplement: inline-supplementary-material-1 [file inline-supplementary-material-1.pdf]

## Online Supplementary Material:

### Burden of Disease and Change in Practice in Critically Ill Infants with Bronchiolitis in Australia and New Zealand 2002 to 2014

Luregn J Schlapbach<sup>1,2,3\*</sup>, Lahn Straney<sup>4\*</sup>, Ben Gelbart<sup>5,6</sup>, Janet Alexander<sup>7,8</sup>, Donna Franklin<sup>1</sup>, John Beca<sup>9</sup>, Jennifer A. Whitty<sup>10,11</sup>, Subodh Ganu<sup>12,13</sup>, Barry Wilkins<sup>14</sup>, Elizabeth Croston<sup>15</sup>, Simon Erickson<sup>15</sup>, Andreas Schibler<sup>1,2</sup>

on behalf of the Australian & New Zealand Intensive Care Society (ANZICS) Centre for Outcomes & Resource Evaluation (CORE) and the Australian & New Zealand Intensive Care Society (ANZICS) Paediatric Study Group

#### Methods

**ANZPIC Registry.** The ANZPIC Registry was created in 1997 and prospectively records demographics, physiologic variables at admission, intensive care support, diagnoses and outcomes of PICU and general ICU admissions in children <16 years of age in Australia and New Zealand. The registry captures 92-94% of all pediatric ICU admissions. Data are entered by trained ICU data collectors, and funding is provided by state governments in Australia and New Zealand. Data validation and auditing of PICUs and larger general ICUs are performed biennially.

Population-based admission rate estimates: Age-specific population data were accessed through the Australian Bureau of Statistics (<http://www.abs.gov.au/AUSSTATS/abs@.nsf/second+level+view?ReadForm&prodno=3101.0&viewtitle=Australian%20Demographic%20Statistics~Jun%202012~Previous~18/12/2012&&tabname=Past%20Future%20Issues&prodno=3101.0&issue=Jun%202012&num=&view=&>) and through Statistics New Zealand (<http://www.stats.govt.nz/estimates-projections>).

The diagnosis of bronchiolitis was based on the prospective diagnostic coding used in each patient in the ANZPIC Registry, including the principal diagnosis, the underlying diagnosis, or any of the associated diagnoses. The coding is based on the ICU discharge diagnosis by the ICU physicians.

**Comorbidity definitions:** The following comorbidities were defined to characterize patients with underlying disease: prematurity (< 37 weeks gestational age), chronic lung disease, underlying chronic respiratory disease other than prematurity-related chronic lung disease, congenital heart disease, chronic neurologic disease (encephalopathy; chronic central or peripheral nervous system disease), and other comorbidities (including renal disease, immunodeficiency or immunosuppression, haematological or solid organ tumors, status post bone marrow transplantation, and solid organ transplant recipients).

#### Cost estimates:

The ANZPIC registry data were used to estimate the costs of bronchiolitis in Australia and New Zealand, using 2014 Australian dollar costings. The costing model applied standardised prices from the National Efficient Price Determination (2014/2015) ([https://www.ihsa.gov.au/sites/g/files/net636/t/publications/national\\_efficient\\_price\\_determination\\_2014-15.pdf](https://www.ihsa.gov.au/sites/g/files/net636/t/publications/national_efficient_price_determination_2014-15.pdf)). This model presents the activity based funding that would be provided by the Commonwealth to hospitals, based on an assumed Australian Refined Diagnosis – Related Group of Bronchiolitis with complications (E70A), weighted for time spent in intensive care, length of hospital stay and/or paediatric service. For the years 2003-2014 if data for hospital LOS were missing, imputation was used based on the median LOS for that corresponding year for general or paediatric ICU settings. As there were limited hospital LOS data available for 2002, the median LOS for 2003 was imputed for 2002.

#### Statistics and risk prediction models:

To assess change in risk-adjusted mortality, we recalibrated PIM2 among these patients using the linear prediction of the PIM2 model in a logistic regression model. Population-based admission rate estimates were calculated. We assessed linear trends in respiratory support over the 13-year period. In addition, trends during the 13-year study period were

assessed by comparing risk-adjusted need for invasive ventilation. We constructed a multivariate prediction model for the need for invasive ventilation. For multivariable models, all significant predictors from the univariable analyses were used. We used a backward stepwise elimination procedure to eliminate non-significant predictors based on  $p > 0.05$ . For risk prediction models, we ran a saturated mix-effects logistic regression model clustering on site. The variance of the random effect was used as a measure of unit-level variation. To avoid spurious associations between predictors that were correlated with time, we ran the saturated model with the year of admission. The model building process was undertaken using backward elimination of the covariate with the highest p-value. We selected the final model based on the lowest Akaike information criterion (AIC)<sup>1</sup>. The final model excluded year of admission from the model to calculate risk-adjusted change over time. A risk score for each child was calculated using the fixed effects portion of the model and the mean was calculated to estimate the average risk score of intubation. Unit level variability was reported using the predicted probability of intubation in each site for a child with the mean risk score and the site-specific random effect.

### **Acknowledgements**

We thank the Paediatric Study Group of the Australian and New Zealand Intensive Care Society for supporting this study (Simon Erickson, Princess Margaret Hospital for Children, Perth, Australia; Andreas Schibler, Anthony Slater, Debbie Long, Jan Alexander, Lady Cilento Children's Hospital, Brisbane, Australia; John Beca, Claire Sherring, Starship Children's Hospital, Auckland, New Zealand; Gary Williams, Janelle Young, Mary Lou Morrill, Sydney Children's Hospital, Randwick, Australia; Johnny Millar, Carmen Del Zoppo, Warwick Butt, Royal Children's Hospital, Melbourne, Australia; Subodh Ganu, Georgia Letton, Women's and Children's Hospital, Adelaide, Australia; Marino Festa, Westmead Children's Hospital, Sydney, Australia). We thank the intensivists, data managers and other staff in the participating ICUs for their data contributions. The ANZPIC Registry is supported by the Australian and New Zealand Intensive Care Society, the Ministry of Health (New Zealand), and State and Territory Health Departments through the Australian Health Ministers' Advisory Council

**Online Supplement Figure S1: Kaplan-Meier curves comparing time to intubation (in hours) from PICU admission in infants with bronchiolitis admitted to PICU. Only infants that were not intubated during the first hour of admission were included.**

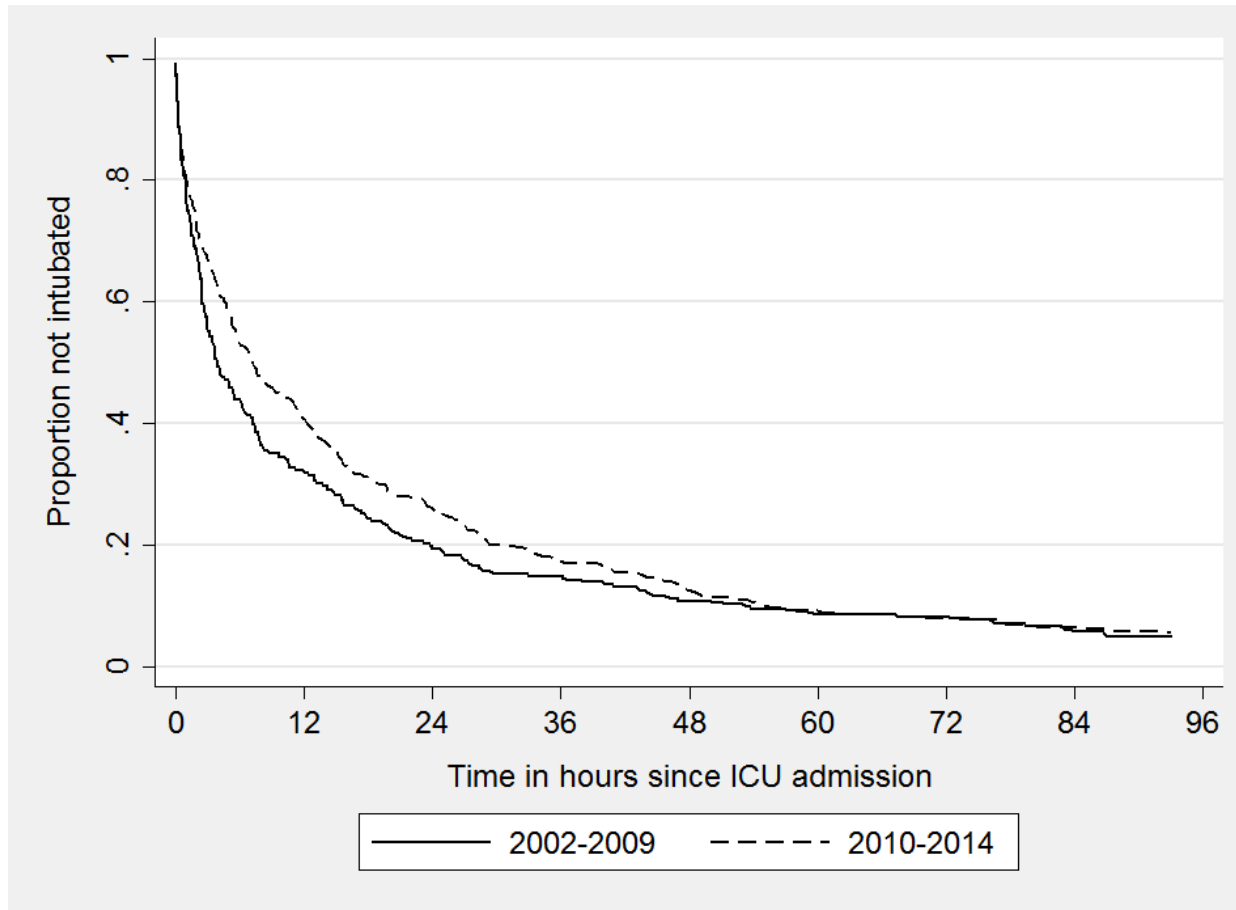

**Online Supplement Table S1: Respiratory support mode and duration of respiratory support in infants with bronchiolitis admitted to ICU per year are shown for A) all ICU admissions captured in the Australian and New Zealand Paediatric Intensive Care Registry; B) admissions to Pediatric Intensive Care Units (PICUs); C) admissions to general Intensive Care Units (ICUs); D) admissions to PICUs and ICUs that had contributed to the registry for the entire study duration 2002-2014. Mechanical ventilation is defined as intubation and/or non-invasive ventilation. HFNC, High-Flow Nasal Cannulae.**

**Online Supplement Table S1 A: All ICUs**

| Year                | Proportion of respiratory support |                           |                          |                        | Mean duration of respiratory support (hours)* |                          |                          |                          | All respiratory support  |
|---------------------|-----------------------------------|---------------------------|--------------------------|------------------------|-----------------------------------------------|--------------------------|--------------------------|--------------------------|--------------------------|
|                     | Mechanical Ventilation**          | Invasive ventilation      | Non-Invasive Ventilation | HFNC                   | Mechanical Ventilation**                      | Invasive ventilation     | Non-Invasive Ventilation | HFNC                     |                          |
| 2002                | 57.2%                             | 36.6%                     | 30.5%                    |                        | 108.6                                         | 125.5                    | 53.1                     |                          | 62.1                     |
| 2003                | 53.9%                             | 30.9%                     | 35.0%                    |                        | 84.1                                          | 105.1                    | 36.7                     |                          | 45.4                     |
| 2004                | 57.4%                             | 29.2%                     | 42.6%                    |                        | 102.7                                         | 147.2                    | 37.2                     |                          | 58.9                     |
| 2005                | 56.8%                             | 29.5%                     | 42.4%                    |                        | 93.9                                          | 112.4                    | 47.8                     |                          | 53.4                     |
| 2006                | 60.5%                             | 26.9%                     | 47.5%                    |                        | 94.1                                          | 134.7                    | 43.4                     |                          | 56.9                     |
| 2007                | 62.8%                             | 26.5%                     | 49.7%                    |                        | 88.0                                          | 126.1                    | 44.0                     |                          | 55.3                     |
| 2008                | 53.2%                             | 23.5%                     | 40.9%                    |                        | 87.2                                          | 119.9                    | 44.6                     |                          | 46.4                     |
| 2009                | 63.4%                             | 25.9%                     | 46.8%                    |                        | 84.7                                          | 125.7                    | 45.3                     |                          | 53.7                     |
| 2010                | 58.6%                             | 24.5%                     | 42.2%                    | 24.7%                  | 76.7                                          | 95.8                     | 50.9                     | 44.3                     | 55.9                     |
| 2011                | 62.0%                             | 16.6%                     | 59.3%                    | 35.8%                  | 68.8                                          | 109.3                    | 41.4                     | 35.5                     | 55.4                     |
| 2012                | 58.1%                             | 20.1%                     | 44.7%                    | 54.7%                  | 70.8                                          | 98.7                     | 47.8                     | 37.1                     | 61.5                     |
| 2013                | 46.6%                             | 12.6%                     | 38.5%                    | 71.2%                  | 55.6                                          | 84.1                     | 39.8                     | 31.6                     | 48.4                     |
| 2014                | 44.8%                             | 10.8%                     | 38.2%                    | 72.6%                  | 69.2                                          | 122.3                    | 46.6                     | 35.3                     | 56.6                     |
| $\beta$<br>(95% CI) | -0.01<br>(-0.01 to 0.00)          | -0.02<br>(-0.02 to -0.01) | 0.01<br>(-0.01 to 0.02)  | 0.06<br>(0.04 to 0.09) | -3.40<br>(-4.56 to -2.25)                     | -2.23<br>(-4.77 to 0.30) | 0.09<br>(-0.75 to 0.92)  | -2.19<br>(-5.82 to 1.44) | -0.03<br>(-0.92 to 0.86) |
| P<br>(trend)        | 0.2311                            | <0.0001                   | 0.2787                   | 0.0001                 | <0.0001                                       | 0.0789                   | 0.8260                   | 0.1503                   | 0.9472                   |

\* Among those children receiving this mode of respiratory support

\*\* Defined as intubation and/or non-invasive ventilation

HFNC, High-Flow Nasal Cannulae

**Online Supplement Table S1 B: PICU**

| Year      | Proportion of respiratory support |                      |                          |                | Mean duration of respiratory support (hours)* |                      |                          |                 | All respiratory support |
|-----------|-----------------------------------|----------------------|--------------------------|----------------|-----------------------------------------------|----------------------|--------------------------|-----------------|-------------------------|
|           | Mechanical Ventilation**          | Invasive ventilation | Non-Invasive Ventilation | HFNC           | Mechanical Ventilation**                      | Invasive ventilation | Non-Invasive Ventilation | HFNC            |                         |
| 2002      | 56.7%                             | 37.2%                | 29.6%                    |                | 109.8                                         | 125.2                | 53.1                     |                 | 62.3                    |
| 2003      | 54.1%                             | 32.3%                | 33.8%                    |                | 88.0                                          | 105.7                | 39.8                     |                 | 47.6                    |
| 2004      | 58.1%                             | 30.4%                | 42.5%                    |                | 106.0                                         | 148.2                | 39.0                     |                 | 61.6                    |
| 2005      | 65.2%                             | 34.1%                | 48.5%                    |                | 94.6                                          | 112.4                | 48.2                     |                 | 61.7                    |
| 2006      | 58.1%                             | 31.1%                | 42.6%                    |                | 105.0                                         | 137.5                | 42.6                     |                 | 61.0                    |
| 2007      | 64.5%                             | 29.3%                | 51.1%                    |                | 94.2                                          | 129.0                | 45.0                     |                 | 60.8                    |
| 2008      | 56.1%                             | 25.1%                | 44.8%                    |                | 90.8                                          | 126.6                | 42.6                     |                 | 50.9                    |
| 2009      | 64.9%                             | 27.6%                | 47.7%                    |                | 91.2                                          | 131.2                | 48.1                     |                 | 59.2                    |
| 2010      | 58.9%                             | 29.6%                | 38.7%                    | 30.7%          | 80.4                                          | 101.4                | 44.7                     | 41.4            | 60.1                    |
| 2011      | 58.8%                             | 19.3%                | 55.4%                    | 48.2%          | 83.3                                          | 120.8                | 46.3                     | 35.3            | 66.0                    |
| 2012      | 52.4%                             | 21.4%                | 39.2%                    | 62.1%          | 80.1                                          | 105.2                | 49.6                     | 40.6            | 67.2                    |
| 2013      | 45.5%                             | 13.7%                | 37.0%                    | 76.0%          | 63.9                                          | 92.0                 | 44.6                     | 32.1            | 53.4                    |
| 2014      | 46.3%                             | 13.0%                | 39.4%                    | 74.9%          | 84.5                                          | 135.1                | 55.0                     | 35.9            | 66.1                    |
| $\beta$   | -0.01                             | -0.02                | 0.00                     | 0.07           | -2.54                                         | -1.24                | 0.44                     | -1.41           | 0.46                    |
| (95% CI)  | (-0.02 to 0.00)                   | (-0.02 to -0.01)     | (-0.01 to 0.02)          | (0.04 to 0.10) | (-3.83 to -1.24)                              | (-3.90 to 1.42)      | (-0.32 to 1.19)          | (-5.12 to 2.29) | (-0.49 to 1.42)         |
| P (trend) | 0.0845                            | 0.0000               | 0.4860                   | 0.0001         | 0.0012                                        | 0.3264               | 0.2296                   | 0.3119          | 0.3105                  |

\* Among those children receiving this mode of respiratory support

\*\* Defined as intubation and/or non-invasive ventilation

HFNC, High-Flow Nasal Cannulae

Online Supplement Table S1 C: general ICUs

| Year      | Proportion of respiratory support |                      |                          |                | Mean duration of respiratory support (hours)* |                      |                          |                  | All respiratory support |
|-----------|-----------------------------------|----------------------|--------------------------|----------------|-----------------------------------------------|----------------------|--------------------------|------------------|-------------------------|
|           | Mechanical Ventilation**          | Invasive ventilation | Non-Invasive Ventilation | HFNC           | Mechanical Ventilation**                      | Invasive ventilation | Non-Invasive Ventilation | HFNC             |                         |
| 2002      | 64.0%                             | 28.0%                | 44.0%                    |                | 93.4                                          | 130.2                | 53.0                     |                  | 59.8                    |
| 2003      | 52.9%                             | 23.5%                | 41.2%                    |                | 63.3                                          | 101.5                | 23.5                     |                  | 33.5                    |
| 2004      | 48.1%                             | 14.8%                | 44.4%                    |                | 52.8                                          | 123.1                | 16.2                     |                  | 25.4                    |
| 2005      | 3.8%                              | 0.0%                 | 3.8%                     |                | 17.5                                          | 0.0                  | 17.5                     |                  | 0.7                     |
| 2006      | 70.2%                             | 9.6%                 | 67.3%                    |                | 57.0                                          | 96.5                 | 45.7                     |                  | 40.0                    |
| 2007      | 57.1%                             | 17.5%                | 45.2%                    |                | 65.9                                          | 110.7                | 40.5                     |                  | 37.6                    |
| 2008      | 43.6%                             | 18.0%                | 27.8%                    |                | 71.7                                          | 88.2                 | 55.2                     |                  | 31.3                    |
| 2009      | 58.8%                             | 20.6%                | 44.1%                    |                | 63.1                                          | 103.3                | 35.9                     |                  | 37.1                    |
| 2010      | 57.9%                             | 11.6%                | 50.9%                    | 9.3%           | 67.2                                          | 59.4                 | 62.8                     | 68.8             | 45.2                    |
| 2011      | 68.1%                             | 11.6%                | 66.5%                    | 12.9%          | 45.7                                          | 74.1                 | 33.9                     | 36.9             | 35.9                    |
| 2012      | 68.5%                             | 17.6%                | 54.7%                    | 41.3%          | 57.9                                          | 84.2                 | 45.5                     | 27.4             | 51.0                    |
| 2013      | 48.6%                             | 10.5%                | 41.3%                    | 62.4%          | 41.4                                          | 65.4                 | 32.0                     | 30.5             | 39.2                    |
| 2014      | 42.4%                             | 7.5%                 | 36.3%                    | 69.1%          | 44.0                                          | 89.2                 | 32.8                     | 34.2             | 42.3                    |
| $\beta$   | 0.01                              | -0.01                | 0.01                     | 0.05           | -1.56                                         | -4.20                | 0.65                     | -7.55            | 0.78                    |
| (95% CI)  | (-0.02 to 0.03)                   | (-0.02 to 0.00)      | (-0.02 to 0.04)          | (0.03 to 0.08) | (-4.46 to 1.34)                               | (-6.67 to -1.72)     | (-1.75 to 3.04)          | (-21.18 to 6.07) | (-1.54 to 3.09)         |
| P (trend) | 0.6891                            | 0.1846               | 0.5180                   | 0.0010         | 0.2623                                        | 0.0036               | 0.5634                   | 0.1759           | 0.4756                  |

\* Among those children receiving this mode of respiratory support

**Online Supplement Table S1 D: PICUs and ICUs that had contributed to the registry for the entire study duration 2002-2014.**

| Year      | Proportion of respiratory support |                      |                          |                | Mean duration of respiratory support (hours)* |                      |                          |                 | All respiratory support |
|-----------|-----------------------------------|----------------------|--------------------------|----------------|-----------------------------------------------|----------------------|--------------------------|-----------------|-------------------------|
|           | Mechanical Ventilation**          | Invasive ventilation | Non-Invasive Ventilation | HFNC           | Mechanical Ventilation**                      | Invasive ventilation | Non-Invasive Ventilation | HFNC            |                         |
| 2002      | 57.1%                             | 36.6%                | 30.5%                    |                | 109.5                                         | 126.3                | 53.4                     |                 | 62.5                    |
| 2003      | 55.8%                             | 32.2%                | 36.2%                    |                | 85.4                                          | 106.1                | 37.1                     |                 | 47.6                    |
| 2004      | 58.1%                             | 29.9%                | 43.0%                    |                | 103.5                                         | 147.2                | 37.5                     |                 | 60.2                    |
| 2005      | 59.9%                             | 31.4%                | 44.6%                    |                | 93.3                                          | 113.4                | 45.5                     |                 | 55.9                    |
| 2006      | 60.0%                             | 29.0%                | 45.7%                    |                | 96.9                                          | 136.5                | 40.6                     |                 | 58.1                    |
| 2007      | 64.5%                             | 28.1%                | 51.7%                    |                | 91.4                                          | 129.0                | 44.1                     |                 | 59.0                    |
| 2008      | 53.7%                             | 23.9%                | 42.4%                    |                | 84.2                                          | 119.2                | 39.4                     |                 | 45.2                    |
| 2009      | 65.9%                             | 28.0%                | 48.3%                    |                | 85.6                                          | 123.8                | 45.1                     |                 | 56.4                    |
| 2010      | 62.3%                             | 29.8%                | 42.5%                    | 28.2%          | 74.4                                          | 97.1                 | 40.9                     | 38.8            | 57.3                    |
| 2011      | 59.8%                             | 18.1%                | 56.7%                    | 42.7%          | 77.6                                          | 119.8                | 43.7                     | 35.9            | 61.7                    |
| 2012      | 56.0%                             | 21.3%                | 42.6%                    | 57.1%          | 73.7                                          | 100.2                | 46.8                     | 39.5            | 63.8                    |
| 2013      | 48.9%                             | 13.4%                | 40.6%                    | 75.9%          | 58.6                                          | 89.6                 | 41.0                     | 30.3            | 51.6                    |
| 2014      | 49.7%                             | 12.8%                | 42.5%                    | 75.9%          | 76.0                                          | 129.9                | 49.7                     | 33.8            | 63.5                    |
| $\beta$   | 0.00                              | -0.02                | 0.01                     | 0.07           | -3.03                                         | -1.73                | 0.17                     | -1.55           | 0.29                    |
| (95% CI)  | (-0.01 to 0.00)                   | (-0.02 to -0.01)     | (0.00 to 0.02)           | (0.04 to 0.09) | (-4.23 to -1.83)                              | (-4.30 to 0.85)      | (-0.63 to 0.97)          | (-4.87 to 1.77) | (-0.69 to 1.27)         |
| P (trend) | 0.2526                            | 0.0000               | 0.1868                   | 0.0001         | 0.0002                                        | 0.1682               | 0.6524                   | 0.2346          | 0.5223                  |

\* Among those children receiving this mode of respiratory support

**Online Supplement Table S2: Estimates of population-based intubation rates in infants with bronchiolitis admitted to ICU per year.** Analyses are shown for all ICU admissions captured in the Australian and New Zealand Paediatric Intensive Care Registry; admissions to Pediatric Intensive Care Units (PICUs); admissions to general Intensive Care Units (ICUs); and admissions to PICUs and ICUs that had contributed to the registry for the entire study duration 2002-2014.

| Year      | All PICUs and ICUs |                               | PICU            |                               | General ICUs   |                               | 8 PICUs and 5 ICUs contributing to registry for the entire study duration 2002-2014 |                               |
|-----------|--------------------|-------------------------------|-----------------|-------------------------------|----------------|-------------------------------|-------------------------------------------------------------------------------------|-------------------------------|
|           | n                  | Population rate (per 100,000) | n               | Population rate (per 100,000) | n              | Population rate (per 100,000) | n                                                                                   | Population rate (per 100,000) |
| 2002      | 140                | 22.86                         | 133             | 21.72                         | 7              | 1.14                          | 139                                                                                 | 22.69                         |
| 2003      | 98                 | 16.06                         | 86              | 14.09                         | 12             | 1.97                          | 97                                                                                  | 15.89                         |
| 2004      | 107                | 17.37                         | 103             | 16.72                         | 4              | 0.65                          | 107                                                                                 | 17.37                         |
| 2005      | 112                | 17.88                         | 112             | 17.88                         | 0              | 0.00                          | 111                                                                                 | 17.72                         |
| 2006      | 143                | 22.28                         | 133             | 20.72                         | 10             | 1.56                          | 134                                                                                 | 20.87                         |
| 2007      | 140                | 20.72                         | 118             | 17.47                         | 22             | 3.26                          | 118                                                                                 | 17.47                         |
| 2008      | 136                | 19.37                         | 112             | 15.95                         | 24             | 3.42                          | 108                                                                                 | 15.38                         |
| 2009      | 142                | 19.87                         | 114             | 15.95                         | 28             | 3.92                          | 124                                                                                 | 17.35                         |
| 2010      | 188                | 26.14                         | 163             | 22.66                         | 25             | 3.48                          | 169                                                                                 | 23.49                         |
| 2011      | 146                | 20.50                         | 110             | 15.44                         | 36             | 5.05                          | 110                                                                                 | 15.44                         |
| 2012      | 242                | 33.52                         | 167             | 23.13                         | 75             | 10.39                         | 176                                                                                 | 24.38                         |
| 2013      | 162                | 21.91                         | 114             | 15.42                         | 48             | 6.49                          | 119                                                                                 | 16.09                         |
| 2014      | 165                | 22.55                         | 119             | 16.27                         | 46             | 6.29                          | 130                                                                                 | 17.77                         |
| $\beta$   | 6.62               | 0.59                          | 1.99            | -0.03                         | 4.63           | 0.62                          | 2.23                                                                                | -0.01                         |
| (95% CI)  | (2.01 to 11.22)    | (-0.07 to 1.24)               | (-1.62 to 5.60) | (-0.55 to 0.49)               | (2.73 to 6.52) | (0.35 to 0.88)                | (-1.53 to 5.98)                                                                     | (-0.55 to 0.52)               |
| p (trend) | 0.0091             | 0.0732                        | 0.2505          | 0.9020                        | 0.0002         | 0.0004                        | 0.2185                                                                              | 0.9603                        |



**Online Supplementary Table S3: Multivariate model to prediction of likelihood of requiring intubation and invasive ventilation in critically ill infants with bronchiolitis.** Data are based on a saturated mix-effects logistic regression model clustering on site and adjusted for all variables shown in the table. Data are restricted to A) Infants that were not intubated within the first hour of ICU admission, and B) to infants treated with HFNC and not intubated during the 1<sup>st</sup> hour of ICU admission:

**A) Multivariate prediction of intubation restricted to infants that were not intubated at time on ICU admission (n=8451)**

|                                   | Odds Ratio | (95% CI)         | $\beta$ | (95% CI)           | p      |
|-----------------------------------|------------|------------------|---------|--------------------|--------|
| Age (Days/30)                     | 0.968      | (0.953 to 0.984) | -0.032  | (-0.048 to -0.016) | <0.001 |
| Interhospital transport           | 1.621      | (1.407 to 1.868) | 0.483   | (0.342 to 0.625)   | <0.001 |
| Chronic Neurological Condition    | 1.285      | (0.815 to 2.024) | 0.251   | (-0.204 to 0.705)  | 0.280  |
| Chronic Respiratory Condition     | 1.531      | (1.092 to 2.146) | 0.426   | (0.088 to 0.764)   | 0.014  |
| Bronchopulmonary Dysplasia        | 2.035      | (1.546 to 2.679) | 0.711   | (0.435 to 0.986)   | <0.001 |
| Congenital Heart Defect           | 2.168      | (1.737 to 2.707) | 0.774   | (0.552 to 0.996)   | <0.001 |
| Prematurity                       | 1.198      | (1.006 to 1.427) | 0.180   | (0.006 to 0.355)   | 0.043  |
| RSV                               | 1.609      | (1.394 to 1.857) | 0.475   | (0.332 to 0.619)   | <0.001 |
| Influenza/Parainfluenzae          | 1.978      | (1.440 to 2.718) | 0.682   | (0.364 to 1.000)   | <0.001 |
| Systolic blood pressure $\leq 70$ | 2.916      | (2.145 to 3.963) | 1.070   | (0.763 to 1.377)   | <0.001 |
| Base Excess                       | 0.974      | (0.950 to 0.999) | -0.026  | (-0.052 to -0.001) | 0.043  |
| (Base Excess) <sup>2</sup>        | 1.007      | (1.005 to 1.009) | 0.007   | (0.005 to 0.009)   | <0.001 |
| Constant                          | 0.968      | (0.953 to 0.984) | -0.032  | (-0.048 to -0.016) | <0.001 |

Model performance: ROC AUC=0.72 (0.70-0.73)

**B) Multivariate prediction of intubation in infants not intubated on arrival and treated with High-Flow Nasal Cannulae (n=3049)**

|                                   | Odds Ratio | (95% CI)         | $\beta$ | (95% CI)           | p      |
|-----------------------------------|------------|------------------|---------|--------------------|--------|
| Age (Days/30)                     | 0.935      | (0.902 to 0.970) | -0.067  | (-0.103 to -0.031) | <0.001 |
| Interhospital transport           | 0.967      | (0.694 to 1.348) | -0.033  | (-0.365 to 0.298)  | 0.845  |
| Chronic Neurological Condition    | 1.054      | (0.357 to 3.118) | 0.053   | (-1.031 to 1.137)  | 0.924  |
| Chronic Respiratory Condition     | 1.673      | (0.846 to 3.310) | 0.515   | (-0.167 to 1.197)  | 0.139  |
| Bronchopulmonary Dysplasia        | 2.311      | (1.228 to 4.349) | 0.838   | (0.206 to 1.470)   | 0.009  |
| Congenital Heart Defect           | 3.512      | (2.273 to 5.425) | 1.256   | (0.821 to 1.691)   | <0.001 |
| Prematurity                       | 1.438      | (0.985 to 2.098) | 0.363   | (-0.015 to 0.741)  | 0.060  |
| RSV                               | 1.258      | (0.909 to 1.742) | 0.230   | (-0.096 to 0.555)  | 0.167  |
| Influenza/Parainfluenzae          | 1.238      | (0.569 to 2.692) | 0.213   | (-0.563 to 0.990)  | 0.590  |
| Systolic blood pressure $\leq 70$ | 2.730      | (1.329 to 5.609) | 1.004   | (0.284 to 1.724)   | 0.006  |
| Base Excess                       | 0.914      | (0.861 to 0.972) | -0.089  | (-0.150 to -0.029) | 0.004  |
| (Base Excess) <sup>2</sup>        | 1.006      | (1.002 to 1.010) | 0.006   | (0.002 to 0.010)   | 0.008  |
| Constant                          | 0.935      | (0.902 to 0.970) | -0.067  | (-0.103 to -0.031) | <0.001 |

Model performance: ROC AUC=0.74 (0.70-0.77)

**Online Supplementary Table S4: Direct hospitalization costs for infants with bronchiolitis per year. Mean costs per patient, including ICU and ward costs, are shown in AU\$, separately for Pediatric Intensive Care Units (PICUs) versus general ICUs. Costs are based on the standardised National Efficient Price estimates.**

| Year  | Cost per patient |        | Total cost |           |           |                | Summary    |            |            |            |               |            |            |
|-------|------------------|--------|------------|-----------|-----------|----------------|------------|------------|------------|------------|---------------|------------|------------|
|       | General          | PICU   | General    | Pediatric | Total     | ICU proportion | General    | PICU       |            |            |               |            |            |
|       | Mean             | SD     | Mean       | SD        | ICU cost  | ward cost      | ICU cost   | ward cost  | ICU cost   | ward cost  | % total costs | total cost | total cost |
| 2,002 | 24,571           | 15,987 | 29,667     | 32,428    | 450,699   | 177,836        | 7,301,624  | 3,370,482  | 7,752,323  | 3,548,318  | 68.6          | 628,535    | 10,672,106 |
| 2,003 | 22,613           | 19,560 | 32,012     | 65,878    | 694,072   | 459,174        | 4,773,400  | 3,741,913  | 5,467,473  | 4,201,087  | 56.5          | 1,153,247  | 8,515,313  |
| 2,004 | 19,998           | 12,780 | 32,777     | 39,949    | 331,252   | 208,695        | 6,914,274  | 4,197,043  | 7,245,527  | 4,405,738  | 62.2          | 539,947    | 11,111,318 |
| 2,005 | 18,477           | 18,041 | 30,479     | 26,460    | 416,145   | 544,662        | 6,124,645  | 3,872,461  | 6,540,789  | 4,417,124  | 59.7          | 960,807    | 9,997,106  |
| 2,006 | 26,475           | 30,715 | 42,902     | 133,939   | 1,492,448 | 1,260,964      | 9,179,501  | 9,139,854  | 10,671,949 | 10,400,818 | 50.6          | 2,753,411  | 18,319,356 |
| 2,007 | 23,820           | 20,253 | 39,437     | 61,389    | 1,698,067 | 1,303,253      | 8,114,717  | 7,778,538  | 9,812,784  | 9,081,791  | 51.9          | 3,001,320  | 15,893,255 |
| 2,008 | 29,820           | 34,239 | 33,455     | 52,525    | 1,805,356 | 2,160,746      | 8,513,158  | 6,407,941  | 10,318,514 | 8,568,687  | 54.6          | 3,966,102  | 14,921,098 |
| 2,009 | 23,370           | 25,861 | 37,490     | 85,851    | 1,960,210 | 1,218,117      | 8,838,224  | 6,645,107  | 10,798,435 | 7,863,224  | 57.9          | 3,178,327  | 15,483,332 |
| 2,010 | 19,872           | 11,628 | 36,773     | 56,309    | 2,480,658 | 1,811,645      | 10,091,138 | 10,133,951 | 12,571,796 | 11,945,596 | 51.3          | 4,292,303  | 20,225,089 |
| 2,011 | 20,153           | 16,027 | 33,503     | 38,340    | 3,636,948 | 2,610,413      | 11,129,047 | 7,967,907  | 14,765,994 | 10,578,320 | 58.3          | 6,247,360  | 19,096,954 |
| 2,012 | 24,410           | 38,743 | 34,022     | 62,482    | 6,128,484 | 4,270,114      | 14,533,286 | 12,003,541 | 20,661,770 | 16,273,655 | 55.9          | 10,398,598 | 26,536,827 |
| 2,013 | 22,540           | 23,417 | 25,997     | 30,383    | 5,851,196 | 4,404,621      | 13,388,088 | 8,319,706  | 19,239,284 | 12,724,327 | 60.2          | 10,255,817 | 21,707,795 |
| 2,014 | 21,645           | 29,875 | 33,924     | 81,866    | 7,983,325 | 5,241,709      | 17,126,139 | 13,982,132 | 25,109,464 | 19,223,840 | 56.6          | 13,225,034 | 31,108,271 |

1. Akaike H. A new look at the statistical model identification. *IEEE Transactions on Automatic Control* 1994; **19**(6): 716-23.
